# Supplementary material for: Combined effects of inorganic carbon and light on Phaeocystis globosa Scherffel (Prymnesiophyceae)
Source: Copernicus journal article supplement (doi:10.5194/bg-9-1885-2012), 2012-05-29

Table S1: Cell abundance (in triplicates) during the experiment.

| Time (d) | High Light                 |                                     |                             | Low Light                  |                                     |                             |
|----------|----------------------------|-------------------------------------|-----------------------------|----------------------------|-------------------------------------|-----------------------------|
|          | Low<br>CO <sub>2(aq)</sub> | Intermediate<br>CO <sub>2(aq)</sub> | High<br>CO <sub>2(aq)</sub> | Low<br>CO <sub>2(aq)</sub> | Intermediate<br>CO <sub>2(aq)</sub> | High<br>CO <sub>2(aq)</sub> |
| 13.0     | 1.64·10 <sup>4</sup>       | 1.56·10 <sup>4</sup>                | 1.44·10 <sup>4</sup>        | 1.50·10 <sup>4</sup>       | 1.47·10 <sup>4</sup>                | 1.39·10 <sup>4</sup>        |
|          | 1.44·10 <sup>4</sup>       | 1.50·10 <sup>4</sup>                | 1.44·10 <sup>4</sup>        | 1.58·10 <sup>4</sup>       | 1.45·10 <sup>4</sup>                | 1.39·10 <sup>4</sup>        |
|          | 1.51·10 <sup>4</sup>       | 1.49·10 <sup>4</sup>                | 1.37·10 <sup>4</sup>        | 1.53·10 <sup>4</sup>       | 1.40·10 <sup>4</sup>                | 1.42·10 <sup>4</sup>        |
| 13.8     | 5.15·10 <sup>4</sup>       | 4.63·10 <sup>4</sup>                | 3.65·10 <sup>4</sup>        | 3.60·10 <sup>4</sup>       | 3.48·10 <sup>4</sup>                | 3.63·10 <sup>4</sup>        |
|          | 5.05·10 <sup>4</sup>       | 4.50·10 <sup>4</sup>                | 3.60·10 <sup>4</sup>        | 3.57·10 <sup>4</sup>       | 3.50·10 <sup>4</sup>                | 3.60·10 <sup>4</sup>        |
|          | 5.05·10 <sup>4</sup>       | 4.55·10 <sup>4</sup>                | 3.59·10 <sup>4</sup>        | 3.66·10 <sup>4</sup>       | 3.45·10 <sup>4</sup>                | 3.66·10 <sup>4</sup>        |
| 14.0     | 1.73·10 <sup>4</sup>       | 1.54·10 <sup>4</sup>                | 1.41·10 <sup>4</sup>        | 1.49·10 <sup>4</sup>       | 1.39·10 <sup>4</sup>                | 1.35·10 <sup>4</sup>        |
|          | 1.58·10 <sup>4</sup>       | 1.51·10 <sup>4</sup>                | 1.49·10 <sup>4</sup>        | 1.55·10 <sup>4</sup>       | 1.39·10 <sup>4</sup>                | 1.37·10 <sup>4</sup>        |
|          | 1.61·10 <sup>4</sup>       | 1.48·10 <sup>4</sup>                | 1.43·10 <sup>4</sup>        | 1.52·10 <sup>4</sup>       | 1.31·10 <sup>4</sup>                | 1.42·10 <sup>4</sup>        |
| 14.7     | 5.25·10 <sup>4</sup>       | 4.41·10 <sup>4</sup>                | 3.69·10 <sup>4</sup>        | 3.77·10 <sup>4</sup>       | 3.54·10 <sup>4</sup>                | 3.64·10 <sup>4</sup>        |
|          | 5.52·10 <sup>4</sup>       | 4.43·10 <sup>4</sup>                | 3.78·10 <sup>4</sup>        | 3.75·10 <sup>4</sup>       | 3.63·10 <sup>4</sup>                | 3.68·10 <sup>4</sup>        |
|          | 5.43·10 <sup>4</sup>       | 4.31·10 <sup>4</sup>                | 3.69·10 <sup>4</sup>        | 3.68·10 <sup>4</sup>       | 3.54·10 <sup>4</sup>                | 3.55·10 <sup>4</sup>        |
| 14.9     | 1.46·10 <sup>4</sup>       | 1.45·10 <sup>4</sup>                | 1.25·10 <sup>4</sup>        | 1.56·10 <sup>4</sup>       | 1.25·10 <sup>4</sup>                | 1.23·10 <sup>4</sup>        |
|          | 1.54·10 <sup>4</sup>       | 1.45·10 <sup>4</sup>                | 1.23·10 <sup>4</sup>        | 1.53·10 <sup>4</sup>       | 1.21·10 <sup>4</sup>                | 1.21·10 <sup>4</sup>        |
|          | 1.51·10 <sup>4</sup>       | 1.43·10 <sup>4</sup>                | 1.20·10 <sup>4</sup>        | 1.41·10 <sup>4</sup>       | 1.21·10 <sup>4</sup>                | 1.23·10 <sup>4</sup>        |
| 15.7     | 5.31·10 <sup>4</sup>       | 4.12·10 <sup>4</sup>                | 3.32·10 <sup>4</sup>        | 3.58·10 <sup>4</sup>       | 3.42·10 <sup>4</sup>                | 3.19·10 <sup>4</sup>        |
|          | 5.32·10 <sup>4</sup>       | 3.95·10 <sup>4</sup>                | 3.19·10 <sup>4</sup>        | 3.74·10 <sup>4</sup>       | 3.36·10 <sup>4</sup>                | 3.26·10 <sup>4</sup>        |
|          | 5.32·10 <sup>4</sup>       | 4.02·10 <sup>4</sup>                | 3.19·10 <sup>4</sup>        | 3.63·10 <sup>4</sup>       | 3.33·10 <sup>4</sup>                | 3.22·10 <sup>4</sup>        |
| 15.9     | 1.48·10 <sup>4</sup>       | 1.46·10 <sup>4</sup>                | 1.31·10 <sup>4</sup>        | 1.47·10 <sup>4</sup>       | 1.23·10 <sup>4</sup>                |                             |
|          | 1.50·10 <sup>4</sup>       | 1.45·10 <sup>4</sup>                | 1.37·10 <sup>4</sup>        | 1.53·10 <sup>4</sup>       | 1.25·10 <sup>4</sup>                | 1.15·10 <sup>4</sup>        |
|          | 1.48·10 <sup>4</sup>       | 1.41·10 <sup>4</sup>                | 1.36·10 <sup>4</sup>        | 1.50·10 <sup>4</sup>       | 1.21·10 <sup>4</sup>                | 1.12·10 <sup>4</sup>        |
| 16.7     | 4.85·10 <sup>4</sup>       | 3.78·10 <sup>4</sup>                | 3.27·10 <sup>4</sup>        | 3.17·10 <sup>4</sup>       | 3.12·10 <sup>4</sup>                | 3.26·10 <sup>4</sup>        |
|          | 4.73·10 <sup>4</sup>       | 3.77·10 <sup>4</sup>                | 3.21·10 <sup>4</sup>        | 3.32·10 <sup>4</sup>       | 3.11·10 <sup>4</sup>                | 3.19·10 <sup>4</sup>        |
|          | 4.86·10 <sup>4</sup>       | 3.70·10 <sup>4</sup>                | 3.28·10 <sup>4</sup>        | 3.26·10 <sup>4</sup>       | 3.07·10 <sup>4</sup>                | 3.30·10 <sup>4</sup>        |
| 16.8     | 1.53·10 <sup>4</sup>       | 1.51·10 <sup>4</sup>                | 1.39·10 <sup>4</sup>        | 1.33·10 <sup>4</sup>       | 1.33·10 <sup>4</sup>                | 1.43·10 <sup>4</sup>        |

|      |                   |                   |                   |                   |                   |                   |
|------|-------------------|-------------------|-------------------|-------------------|-------------------|-------------------|
|      | $1.55 \cdot 10^4$ | $1.51 \cdot 10^4$ | $1.45 \cdot 10^4$ | $1.31 \cdot 10^4$ | $1.36 \cdot 10^4$ | $1.31 \cdot 10^4$ |
|      | $1.44 \cdot 10^4$ | $1.54 \cdot 10^4$ | $1.37 \cdot 10^4$ | $1.34 \cdot 10^4$ | $1.46 \cdot 10^4$ | $1.36 \cdot 10^4$ |
| 17.7 | $5.08 \cdot 10^4$ | $2.96 \cdot 10^4$ | $3.39 \cdot 10^4$ | $2.93 \cdot 10^4$ | $3.74 \cdot 10^4$ | $3.41 \cdot 10^4$ |
|      | $5.09 \cdot 10^4$ | $3.05 \cdot 10^4$ | $3.33 \cdot 10^4$ | $2.91 \cdot 10^4$ | $3.85 \cdot 10^4$ | $3.52 \cdot 10^4$ |
|      | $5.07 \cdot 10^4$ | $2.91 \cdot 10^4$ | $3.40 \cdot 10^4$ | $2.94 \cdot 10^4$ | $3.71 \cdot 10^4$ | $3.38 \cdot 10^4$ |
| 17.8 | $1.52 \cdot 10^4$ | $1.80 \cdot 10^4$ | $1.52 \cdot 10^4$ | $1.45 \cdot 10^4$ | $1.42 \cdot 10^4$ | $1.35 \cdot 10^4$ |
|      | $1.49 \cdot 10^4$ | $1.71 \cdot 10^4$ | $1.49 \cdot 10^4$ | $1.46 \cdot 10^4$ | $1.48 \cdot 10^4$ | $1.41 \cdot 10^4$ |
|      | $1.45 \cdot 10^4$ | $1.70 \cdot 10^4$ | $1.53 \cdot 10^4$ | $1.47 \cdot 10^4$ | $1.43 \cdot 10^4$ | $1.24 \cdot 10^4$ |
| 18.8 | $4.27 \cdot 10^4$ | $4.77 \cdot 10^4$ | $3.64 \cdot 10^4$ | $3.10 \cdot 10^4$ | $3.63 \cdot 10^4$ | $1.24 \cdot 10^4$ |
|      | $4.42 \cdot 10^4$ | $4.69 \cdot 10^4$ | $3.54 \cdot 10^4$ | $3.08 \cdot 10^4$ | $3.54 \cdot 10^4$ | $4.92 \cdot 10^4$ |
|      | $4.60 \cdot 10^4$ | $4.77 \cdot 10^4$ | $3.65 \cdot 10^4$ | $3.06 \cdot 10^4$ | $3.48 \cdot 10^4$ | $3.43 \cdot 10^4$ |

Table S2: Dissolved inorganic carbon concentrations ( $\mu\text{mol}\cdot\text{kg}^{-1}$ ) during the experiment, as measured.

| Time (d) | High Light              |                                  |                          | Low Light               |                                  |                          |
|----------|-------------------------|----------------------------------|--------------------------|-------------------------|----------------------------------|--------------------------|
|          | Low CO <sub>2(aq)</sub> | Intermediate CO <sub>2(aq)</sub> | High CO <sub>2(aq)</sub> | Low CO <sub>2(aq)</sub> | Intermediate CO <sub>2(aq)</sub> | High CO <sub>2(aq)</sub> |
| 13.0     | 1901.2                  |                                  | 2278.3                   | 1914.00                 | 1980.1                           | 2299.1                   |
| 13.8     | 1894.6                  | 2090.4                           | 2253.6                   | 1921.3                  | 1983.4                           | 2299.9                   |
| 14.0     | 1910.6                  | 2107.0                           | 2255.9                   | 1922.6                  | 1992.6                           | 2310.5                   |
| 14.7     | 1909.8                  | 2110.4                           |                          | 1925.7                  | 1981.7                           | 2304.3                   |
| 14.9     | 1921.7                  | 2119.5                           | 2267.1                   | 1925.5                  | 1990.4                           | 2318.6                   |
| 15.7     |                         | 2159.0                           | 2280.1                   |                         | 1990.1                           | 2299.5                   |
| 15.9     | 1928.1                  |                                  | 2287.3                   | 1942.0                  | 2012.5                           | 2323.6                   |
| 16.7     | 1930.0                  | 2145.2                           | 2299.7                   | 1950.9                  | 2016.7                           | 2321.8                   |
| 16.8     | 1936.6                  | 2153.6                           | 2299.8                   | 1948.6                  | 2021.6                           | 2321.3                   |
| 17.7     | 1928.7                  | 2151.9                           | 2306.7                   | 1973.3                  | 2022.2                           | 2319.9                   |
| 17.8     | 1945.6                  | 2160.5                           | 2307.1                   | 1964.1                  | 2025.0                           | 2323.6                   |
| 18.8     | 1931.8                  | 2111.5                           | 2289.5                   | 1950.9                  | 2024.9                           | 2315.9                   |

Table S3: Total Alkalinity ( $\mu\text{mol}\cdot\text{kg}^{-1}$ ) during the experiment, as measured.

| Time (d) | High Light              |                                  |                          | Low Light               |                                  |                          |
|----------|-------------------------|----------------------------------|--------------------------|-------------------------|----------------------------------|--------------------------|
|          | Low CO <sub>2(aq)</sub> | Intermediate CO <sub>2(aq)</sub> | High CO <sub>2(aq)</sub> | Low CO <sub>2(aq)</sub> | Intermediate CO <sub>2(aq)</sub> | High CO <sub>2(aq)</sub> |
| 13.0     | 2474.2                  | 2476.1                           | 2475.9                   | 2474.4                  | 2474.6                           | 2479.7                   |
| 13.8     | 2481.1                  | 2479.2                           | 2479.6                   | 2478.3                  | 2477.2                           | 2480.7                   |
| 14.0     | 2477.7                  | 2478.8                           | 2475.2                   | 2471.0                  | 2470.3                           | 2474.9                   |
| 14.7     | 2474.6                  | 2475.2                           | 2472.8                   | 2472.8                  | 2471.9                           | 2476.2                   |
| 14.9     | 2470.9                  | 2475.8                           | 2469.1                   | 2472.0                  | 2474.0                           | 2476.8                   |
| 15.7     | 2473.5                  | 2475.3                           | 2470.5                   | 2471.7                  | 2470.4                           | 2477.9                   |
| 15.9     | 2471.1                  | 2469.9                           | 2472.0                   | 2474.3                  | 2473.5                           | 2478.5                   |
| 16.7     | 2478.6                  | 2475.9                           | 2476.1                   | 2477.0                  | 2477.1                           | 2485.6                   |
| 16.8     | 2476.6                  | 2474.7                           | 2480.1                   | 2477.5                  | 2473.9                           | 2478.5                   |
| 17.7     | 2479.3                  | 2475.4                           | 2483.4                   | 2476.9                  | 2475.0                           | 2478.8                   |
| 17.8     | 2474.9                  | 2477.7                           | 2481.3                   | 2484.3                  | 2476.0                           | 2477.4                   |
| 18.8     | 2483.5                  | 2480.4                           | 2489.2                   | 2479.8                  | 2478.4                           | 2483.3                   |

Table S4: Nitrate concentrations during the experiment

| Time (d) | High Light              |                                  |                          | Low Light               |                                  |                          |
|----------|-------------------------|----------------------------------|--------------------------|-------------------------|----------------------------------|--------------------------|
|          | Low CO <sub>2(aq)</sub> | Intermediate CO <sub>2(aq)</sub> | High CO <sub>2(aq)</sub> | Low CO <sub>2(aq)</sub> | Intermediate CO <sub>2(aq)</sub> | High CO <sub>2(aq)</sub> |
| 13.0     | 56.5                    | 56.3                             | 58.3                     | 57.3                    | 57.0                             | 57.1                     |
| 13.8     | 53.3                    | 52.6                             | 56.1                     | 55.5                    | 55.5                             | 55.0                     |
| 14.0     | 55.9                    | 55.6                             | 58.4                     | 57.2                    | 57.4                             | 57.9                     |
| 14.7     |                         |                                  | 56.5                     | 55.7                    | 55.5                             | 54.9                     |
| 14.9     | 56.4                    | 56.3                             | 59.1                     | 57.4                    | 57.5                             | 57.5                     |
| 15.7     | 53.1                    | 54.1                             | 56.9                     | 56.2                    | 55.8                             | 55.4                     |
| 15.9     | 56.7                    | 56.4                             | 58.9                     | 57.6                    | 57.8                             | 57.7                     |
| 16.7     | 53.7                    | 54.3                             | 57.2                     | 56.4                    | 55.6                             | 55.4                     |
| 16.8     | 56.6                    | 56.2                             | 59.3                     | 57.9                    | 56.9                             | 57.3                     |
| 17.7     | 53.3                    | 54.1                             | 56.8                     | 56.6                    | 54.7                             | 55.1                     |
| 17.8     | 56.7                    | 55.4                             | 58.7                     | 57.7                    | 56.5                             | 57.1                     |
| 18.8     | 52.4                    | 52.0                             | 55.8                     | 55.9                    | 54.0                             | 54.3                     |

Table S5: Phosphate concentrations during the experiment

| Time (d) | High Light              |                                  |                          | Low Light               |                                  |                          |
|----------|-------------------------|----------------------------------|--------------------------|-------------------------|----------------------------------|--------------------------|
|          | Low CO <sub>2(aq)</sub> | Intermediate CO <sub>2(aq)</sub> | High CO <sub>2(aq)</sub> | Low CO <sub>2(aq)</sub> | Intermediate CO <sub>2(aq)</sub> | High CO <sub>2(aq)</sub> |
| 13.0     | 3.4                     | 3.5                              | 3.5                      | 3.5                     | 3.5                              | 3.4                      |
| 13.8     | 3.2                     | 3.3                              | 3.4                      | 3.4                     | 3.4                              | 3.3                      |
| 14.0     | 3.3                     | 3.4                              | 3.5                      | 3.5                     | 3.5                              | 3.4                      |
| 14.7     |                         |                                  | 3.4                      | 3.4                     | 3.4                              | 3.3                      |
| 14.9     | 3.4                     | 3.4                              | 3.6                      | 3.5                     | 3.5                              | 3.4                      |
| 15.7     | 3.2                     | 3.3                              | 3.4                      | 3.4                     | 3.4                              | 3.3                      |
| 15.9     | 3.5                     | 3.6                              | 3.6                      | 3.6                     | 3.8                              | 3.5                      |
| 16.7     | 3.3                     | 3.3                              | 3.4                      | 3.5                     | 3.4                              | 3.3                      |
| 16.8     | 3.4                     | 3.4                              | 3.5                      | 3.6                     | 3.5                              | 3.4                      |
| 17.7     | 3.3                     | 3.3                              | 3.4                      | 3.5                     | 3.4                              | 3.3                      |
| 17.8     | 3.4                     | 3.4                              | 3.5                      | 3.5                     | 3.5                              | 3.4                      |
| 18.8     | 3.2                     | 3.2                              | 3.3                      | 3.4                     | 3.4                              | 3.2                      |

Figure S1A and B: The difference between the predicted and measured alkalinity ( $A_{T(\text{pred-meas})}$ ,  $\mu\text{mol}\cdot\text{kg}^{-1}$ , as described in the materials and methods) plotted against the particulate organic carbon concentration (POC,  $\mu\text{M}$ ) in a linear regression plot. A. data from all cultures ( $y=-0.14x+13.24$ ,  $r^2=0.03$ ). B. high light data (HL, open circles and solid regression line,  $y=-0.35x+24.29$ ,  $r^2=0.31$ ) and low light data (LL, closed circles and dashed regression line,  $y=0.50x-11.31$ ,  $r^2=0.10$ ) are plotted separate.

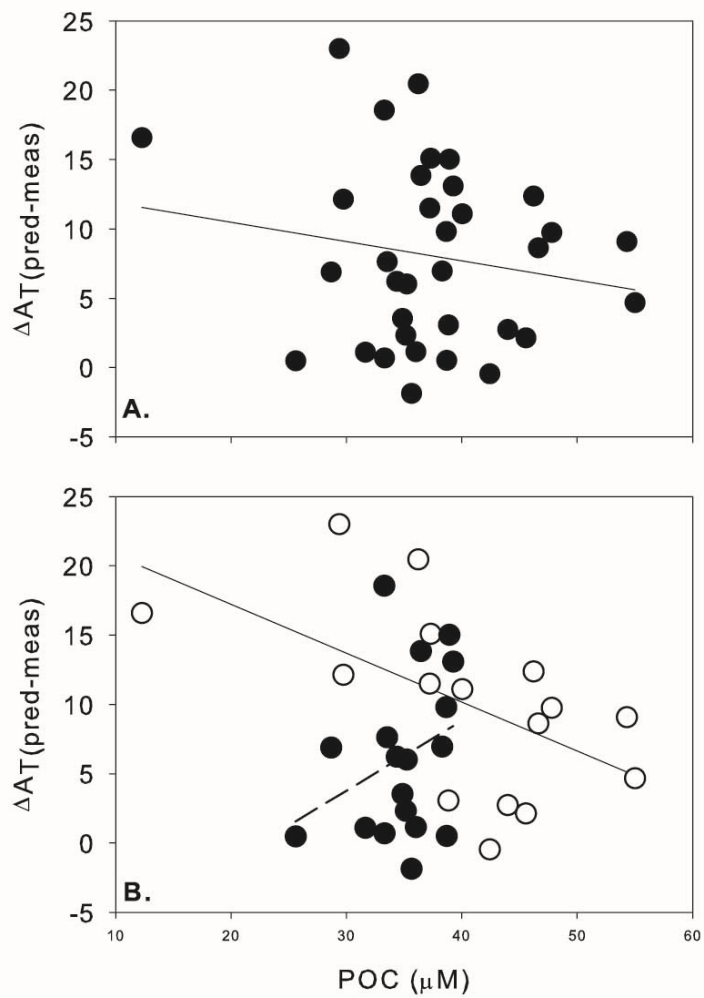

Supplement: Supplementary file 1 [file bg-9-1885-2012-supplement.pdf]
